“Endless Opportunities”: A qualitative exploration of facilitators and barriers to scale-up of two-way texting follow-up after voluntary medical male circumcision in Zimbabwe

Short title: “Endless Opportunities”: A qualitative exploration of facilitators and barriers to a mobile health scale-up in Zimbabwe

Chelsea Elkins<sup>1</sup>, Sandra B. Kokera<sup>2</sup>, Phiona Vumbugwa<sup>1,2</sup>, Jacqueline Gavhera<sup>2</sup>, Kathleen M. West<sup>3</sup>, Katherine S. Wilson<sup>1,4</sup>, Batsirai Makunike-Chikwinya<sup>2</sup>, Lewis Masimba<sup>2</sup>, Marianne Holec<sup>4</sup>, Scott Barnhart<sup>1,4,5</sup>, Sulemana Matinu<sup>1</sup>, Beatrice Wassuna<sup>6</sup>, Caryl Feldacker<sup>1,4\*</sup>.

\*Corresponding author

Email: [cfeld@uw.edu](mailto:cfeld@uw.edu) (CF)

<sup>1</sup> Department of Global Health, University of Washington, Seattle, Washington, United States of America

<sup>2</sup> Zimbabwe Technical Training and Education Centre for Health (Zim-TTECH), Harare, Zimbabwe

<sup>3</sup> Health Systems & Population Health, University of Washington, Seattle, Washington, United States of America

<sup>4</sup> International Training and Education Center for Health, Department of Global Health, University of Washington, Seattle, Washington, United States of America

<sup>5</sup> Department of Medicine, University of Washington, Seattle, Washington, United States of America

<sup>6</sup>Medic, Nairobi Kenya

Key words:

Adult Circumcision, Male

Zimbabwe

Telemedicine

Mobile Health

Evaluation

Two-way Text Messaging

Adverse events

Qualitative research

In-depth interviews

## 1 **ABSTRACT**

2 In Zimbabwe, the ZAZIC consortium employs two-way, text-based (2wT) follow-up to strengthen  
3 post-operative care for voluntary medical male circumcision (VMMC). 2wT scaled nationally  
4 with evidence of client support and strengthened follow-up. However, 2wT uptake remains  
5 suboptimal. Understanding the gap between mobile health (mHealth) potential for innovation  
6 expansion and scale-up realization is critical for 2wT and other mHealth innovations. Therefore,  
7 we conducted an exploratory qualitative study with the objective of identifying 2wT program  
8 strengths, challenges, and suggestions for scale up as part of routine VMMC services. A total of  
9 16 in-depth interviews (IDIs) with diverse 2wT stakeholders were conducted, including nurses,  
10 monitoring & evaluation teams, and technology partners – a combination of perspectives that  
11 provide new insights. We used both inductive and deductive coding for thematic analysis. Among  
12 2wT drivers of expansion success, interviewees noted: 2wT care benefits for clients; effective  
13 hands-on 2wT training; ease of app use for providers; 2wT saved time and money; and 2wT  
14 strengthened client/provider interaction. For 2wT scale-up challenges, staff shortages; network  
15 infrastructure constraints; client costs; duplication of paper and electronic reporting; and  
16 complexity of digital tools integration. To improve 2wT robustness, respondents suggested: more  
17 staff training to offset turnover; making 2wT free for clients; using 2wT to replace paper VMMC  
18 reporting; integrating with routine VMMC reporting systems; and expanding 2wT to other health  
19 areas. High stakeholder participation in app design, implementation strengthening, and evaluation  
20 were appreciated. Several 2wT improvements stemmed from this study, including enrollment of  
21 multiple people on one number to account for phone sharing; 2wT inclusion of minors ages 15+;  
22 clients provided with \$1 to offset SMS costs; and reduced SMS messages to clients. Continued

- 23 2wT mentoring for staff, harmonization of 2wT with Ministry e-health data systems, and increased
- 24 awareness of 2wT's client and provider benefits will help ensure successful 2wT scale-up.

## 25 INTRODUCTION

26 Voluntary medical male circumcision (VMMC) is a critical component of comprehensive HIV  
27 prevention and scaled nationally across much of Sub-Saharan Africa.[1] VMMC is safe with few  
28 serious adverse events (AEs).[2–8] Post-operative follow-up mitigates the risk of AEs and ensures  
29 quality care. In accordance with global guidance, national VMMC guidelines recommend in-  
30 person follow-up visits in the two weeks following procedure.[9] However, with few AEs, in-  
31 person follow-up compounds pressure on already constrained systems in resource-scarce settings,  
32 like Zimbabwe, with severe national healthcare worker (HCW) shortages.[10]

33  
34 The International Training and Education Center for Health (I-TECH) formed the ZAZIC  
35 Consortium (an acronym composed of letters from member partners: Zimbabwe Technical  
36 Assistance, Training and Education Center for Health (Zim-TTECH); Zimbabwe Association of  
37 Church Related Hospitals (ZACH); and Zimbabwe Community Health Intervention Research  
38 Project (ZiCHIRe)) to conduct VMMC in partnership with the Ministry of Health and Child Care  
39 (MoHCC).[10] ZAZIC has been a leader in VMMC innovations since 2013, working to integrate  
40 VMMC services into routine healthcare delivery and ensuring quality service delivery by  
41 exploring and addressing factors that contribute to AEs.[2,11,12] ZAZIC’s VMMC program is  
42 efficient and safe, reaching over 500,000 males with an AE rate of 0.13%.[6]

43  
44 In response to few AEs and required post-operative visits that burdened overstretched VMMC  
45 providers, I-TECH designed, tested, evaluated and scaled an app using two-way texting (2wT) to  
46 improve the quality of post-operative care while reducing the burden on HCWs and reducing costs.  
47 The 2wT system was rigorously tested via a randomized control trial (RCT) in 2019, providing

48 evidence on 2wT safety, usability, and workload reduction.[10,13–15] In brief, the 2wT system  
49 for VMMC is a mobile health (mHealth) innovation that was built using the open-source  
50 Community Health Toolkit (CHT). This 2wT system is optimized for local Zimbabwean users,  
51 allowing VMMC clients to opt into post-operative follow-up via SMS (text message) with VMMC  
52 nurses instead of scheduled, in-person, post-operative visits.[16] 2wT provides automated  
53 educational messages about the healing process and facilitates interactive SMS with a VMMC  
54 nurse for concerns or reassurance, triaging clients to in-person care when needed. 2wT supports  
55 VMMC scale-up by allowing the vast majority of interviewees to heal at home while those in need  
56 of in-person review for potential AEs are promptly referred to on-site care by the 2wT nurse. Since  
57 2019, while overcoming the restrictions and complications of service delivery within the COVID-  
58 19 context, ZAZIC transitioned the 2wT follow-up approach from the RCT to national scale-up,  
59 reaching over 33,000 men by 2023.[17] 2wT was also successfully evaluated in a RCT in both  
60 rural and urban South Africa, with similar findings in safety, usability, efficiency, and improved  
61 quality of follow-up.[18–20]

62  
63 2wT remains a safe and effective follow-up method, with high usability among providers and  
64 clients: over 50% of all ZAZIC VMMC clients receive 2wT-based follow-up. 2wT adheres to the  
65 mHealth principles [21] and aligns with recommendations gleaned from recent mHealth literature  
66 [22–25], including: 1) 2wT follow-up is brief, reducing risks of poor retention, including  
67 challenges related to phone theft/loss; 2) 2wT’s hybrid approach of one-way educational messages  
68 to meet client desires for action-oriented knowledge combined with interactive, client/nurse  
69 telehealth improves engagement in care; 3) VMMC context reduces confidentiality concerns; 4)  
70 locally-led, human-centered design (HCD) tailors content to meet client and HCW needs; 5) SMS

71 meets expressed client preferences while WhatsApp-like interface for providers reduces concerns  
72 of low digital literacy; 6) and, the “Hub-and-Spoke” model provides a dedicated central 2wT nurse,  
73 known as the “Hub Nurse”, to support site-based teams (“spokes”), reducing response delays.

74

75 Despite building upon digital health successes, support for scale-up, and clear evidence of 2wT  
76 advantages, the pace of 2wT expansion remains lower than expected. 2wT is not intended to meet  
77 the needs of all males in all VMMC locations. Yet, adequate network coverage and high phone  
78 ownership suggest that uptake should be closer to 75% of all VMMC clients. Elucidation of some  
79 of the causes and possible strategies to help 2wT fulfill its promise could identify barriers and  
80 potential solutions for other evidence-based apps aimed at improving client care while reducing  
81 HCW workload – a critical issue across many low- and middle-income countries (LMIC).

82

83 Qualitative research that engages diverse stakeholders, including HCWs, can help better  
84 understand app dissemination opportunities and challenges.[24] Soliciting widespread user  
85 feedback as apps move from research to routine practice is also in line with World Health  
86 Organization (WHO) guidance to promote mHealth equity and provide quality evidence for  
87 decisions surrounding expansion, scale-up, and institutionalization.[22,26,27] In the mHealth  
88 field, especially during COVID-19, many apps did not transition from research or niche  
89 implementation to routine practice.[28] Moreover, users who are given multiple opportunities to  
90 provide feedback may be more invested and engaged in digital health programs, an important  
91 consideration as 2wT continues to generate multi-level buy-in for expansion.[14,19,29,30] User  
92 feedback is not a goal that can be accomplished, but rather a core component of frequent and  
93 flexible adjustment and adaptation to specific programmatic context.[19] Encouraging insights and

94 feedback from HCWs, in particular, raises the likelihood of understanding what works in real-  
95 world clinical settings, aiding implementation success.[31] As 2wT has successfully been brought  
96 to scale and maintained for over 2 years in the Zimbabwe setting, there is a unique opportunity for  
97 inquiry to share with others in the growing mHealth field.

98

99 To improve the current program as well as inform future 2wT scale-up efforts, we conducted an  
100 exploratory qualitative study among 2wT stakeholders, including 2wT supervisors, enrollment  
101 nurses at 2wT VMMC sites, ZAZIC collaborators, and staff from 2wT technology partner, Medic  
102 Mobile. The main objective of the study was to identify 2wT program strengths, challenges, and  
103 suggestions for 2wT scale up as part of routine ZAZIC VMMC services. Engaging this broad  
104 group of digital health users is critical to inform successful scale up from RCT to widespread use  
105 in the routine VMMC setting. Incorporation of more voices from LMIC public health settings also  
106 enriches the optimization process and further improves fit of digital health where these innovations  
107 are most needed.

## 108 **METHODS**

### 109 **Setting**

110 The ZAZIC Consortium provides comprehensive VMMC services in partnership with MoHCC in  
111 14 districts, with a mix of urban, peri-urban and rural sites in Zimbabwe. VMMC demand creation  
112 and service delivery are also aimed at populations at higher risk of HIV, like artisanal mining and  
113 high migratory communities. We interviewed 16 2wT program partners for this study. We defined  
114 a *2wT program partner* as an individual from an organization that participated in the design,  
115 implementation, scale up, and/or maintenance of ZAZIC's 2wT program for VMMC follow-up.



116 Interviewees included staff in a variety of roles across the ZAZIC Consortium; employees from  
117 the program’s technology partner, Medic Mobile; and MoHCC nurses implementing 2wT on site.  
118 ZAZIC and MoHCC site nurses are all based in Zimbabwe’s Harare, Midlands, Mashonaland  
119 Central, Mashonaland East, Mashonaland West, Masvingo, Matabeleland North and South  
120 Provinces. Medic Mobile employees interviewed are located in Kenya, Ghana, Uganda, and  
121 Nigeria.

### 122 **2wT Intervention at scale**

123 The 2wT system has been described in detail previously.[14,15,17] Within the ZAZIC program,  
124 clients are enrolled into 2wT on the day of VMMC by VMMC site teams. On the day of VMMC,  
125 2wT clients receive augmented post-operative counseling about how to interact with the 2wT  
126 system and reminders on signs of complication to monitor during the follow-up period. After the  
127 procedure, clients receive a daily text with an educational message or a prompt for a response. On  
128 interactive prompt days, clients have the option to respond with “0” (no issues) or “1” (possible  
129 problem), indicating whether they have concerns about their healing. A 2wT nurse interacts with  
130 all males who report a problem or those who write and SMS into the 2wT system with a concern.  
131 If the men do not respond with a concern, there is no immediate follow-up. Men who do not  
132 respond at all by day 7 are contacted with a call to confirm there are no issues.

133

134 Clients can send an SMS message to the 2wT system at any time. After-hours coverage on  
135 weekends and holidays ensures a timely response for urgent matters, with the regular 2wT nurse  
136 responding during routine clinic hours. Figure 1 (below) illustrates the 2wT interaction flow.[10]  
137 The 2wT implementation operates as a Hub (the central 2wT “Hub Nurse”) and spokes (all sites),  
138 referred to as a “Hub-and-Spoke model”. Sites enroll 2wT clients and conduct follow-up visits,

139 completing forms on in-person visits and observed AEs. The 2wT Hub Nurse interacts with men  
 140 from all sites on a daily basis, providing reassurance, triaging men to in-person reviews using a  
 141 “referral for care” form, and contacting men who do not respond by SMS or phone. The Hub Nurse  
 142 refers men who have not responded to sites for follow up on Day 8.

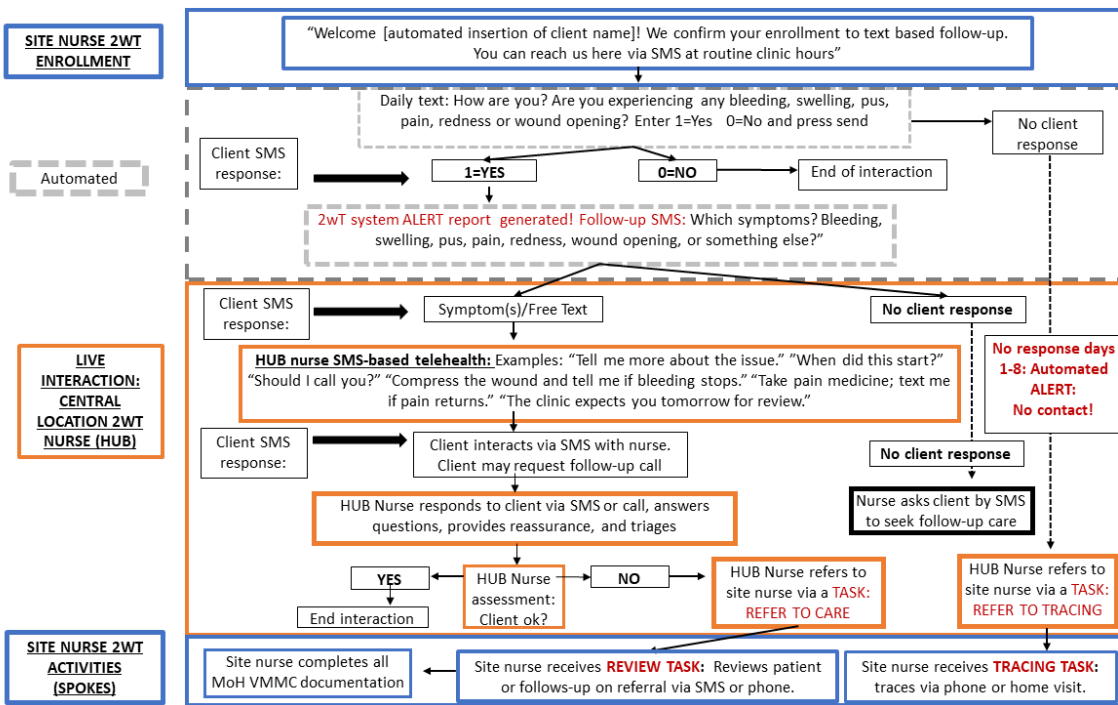

143  
 144 **Figure 1: 2wT System VMMC Follow-Up Flow[10]**

145 **2wT Training for scale-up**

146 For scale-up, 2wT training was conducted by a core team of four ZAZIC HCWs over a 1-week  
 147 period and included 30 administrative staff from the MoHCC national-, province-, and district-  
 148 levels. The training was cascaded down to facility levels by ZAZIC teams with two nurses per site  
 149 attending a two-day training. Trainings were conducted virtually or in-person on-site, depending  
 150 on COVID-19 protocols and logistics issues. In both formats, training included facility nurses, data  
 151 clerks, site managers, and demand creation staff. The ‘trainer-of-trainers’ approach with on-the-  
 152 job mentorship was used: the first group of trained staff subsequently trained other staff at their

153 sites as staff turned over. The 2wT training curriculum includes theory and practical sessions  
154 conducting post-operative counseling; enrolling clients; documenting visits and client tracing  
155 outcomes into the 2wT system; and routine monitoring and evaluation. In-person trainings  
156 resumed immediately after COVID-19 precautions were reduced.

## 157 **Data Collection**

158 We conducted interviews from December 17<sup>th</sup>, 2021 to February 27, 2022. We selected 16  
159 interviewees, using a combination of purposive and snowball sampling from ZACH, ZICHIRE, I-  
160 TECH, MoHCC and Medic Mobile teams who provided direct management, support, or  
161 implementation of 2wT at national-, district-, or health facility-level.[10,32] The sample size is  
162 reflective of research demonstrating that a high quantity of interviews is often not necessary for  
163 high caliber qualitative research,[33] as well as a recent review of qualitative studies that noted  
164 studies with 9-17 individual interviews can be sufficient for thematic saturation.[34] Furthermore,  
165 our goal was to hear from key implementing partners in the 2wT program, and we successfully  
166 interviewed the majority of partners (16/21) across all organizations that supported the program  
167 implementation. We conducted and recorded the individual in-depth interviews (IDIs) via Zoom  
168 or WhatsApp using a semi-structured interview guide.[21] Interviews were conducted remotely  
169 due to COVID-19 health concerns. Most interviews lasted 20-35 minutes, with an average length  
170 of 27 minutes. The lead researcher transcribed the interviews, editing for clarity as needed.

## 171 **Data Analysis**

172 We undertook a thematic analysis approach.[35] We iteratively developed a codebook, initially  
173 identifying codes deductively based on study goals and interests. Additional inductive, or open,  
174 coding allowed us to capture unanticipated ideas regarding program barriers.[36] After several

175 iterations, a program member reviewed and commented on the draft before we finalized the  
176 codebook. The primary coder (CE) applied the codebook to all transcripts using ATLAS.ti version  
177 9.[35,36] A secondary coder (SK) reviewed the primary codes and identified additional open codes  
178 and minor discrepancies in interpretation that were resolved through a common writing  
179 process.[37] The study team identified, a priori, three domains according to study goals. We sorted  
180 codes into these domains and examined the coded data for patterns within and across stakeholder  
181 groups, to develop into themes under each domain. Again, we undertook a member checking  
182 process with individuals in the program, as well as the larger study team, to ensure accurate  
183 interpretation and communication of ideas.

#### 184 **Positionality and trustworthiness**

185 The lead interviewer is not employed by Zim-TTECH, nor any partner organization, but is  
186 affiliated with the University of Washington Department of Global Health, a funder of the 2wT  
187 project. This may have impacted how interviewees responded to questions. The remaining authors  
188 are either from, or work closely with, the Zim-TTECH organization which may have influenced  
189 their interpretation of the responses. All researchers were attentive to iterative process evaluations  
190 of trustworthiness,[25] assessing and strengthening the study's methodological rigor,  
191 transparency, and inclusion across data collection, analysis, and results reporting phases.

192

#### 193 **Ethics**

194 The human subjects division of the University of Washington's Internal Review Board determined  
195 that these human subjects research activities are for the purposes of quality improvement that

196 qualifies for exempt status (IRB ID: STUDY00014561). All program partners provided verbal  
197 consent to be interviewed and recorded prior to participating in this study.

## 198 RESULTS

### 199 Interviewee Characteristics

200 Among 21 partners contacted, 16 participated in the study, representing the five organizations  
201 responsible for the 2wT implementation process. Interviewees either worked for the technology  
202 partner, Medic Mobile (n=5); as MoHCC site nurses (n=2); or within the ZAZIC Consortium  
203 (n=9), including Zim-TTECH (n=3); ZACH (n=3), and ZiCHIRe (n=3). Most interviewees (n=11)  
204 lived in Zimbabwe, except for Medic Mobile interviewees who were based in Kenya, Ghana,  
205 Nigeria, or Uganda (Table 1).

206

207 **Table 1:** Characteristics of Participating Program Partners (N=16)

| <b>Program Partner</b>  | <b>Definition</b>                                                                                                                                                                                                                   | <b>Interacts with clients directly</b> | <b>Location</b>               | <b>n</b> |
|-------------------------|-------------------------------------------------------------------------------------------------------------------------------------------------------------------------------------------------------------------------------------|----------------------------------------|-------------------------------|----------|
| <b>ZAZIC Consortium</b> | Staff who support the design, implementation, scale-up, and/or maintenance of 2wT and are part of ZAZIC Consortium. ZAZIC consists of: <ul style="list-style-type: none"><li>• Zim-TTECH</li><li>• ZiCHIRe</li><li>• ZACH</li></ul> | Yes (6/9)                              | Zimbabwe                      | 9        |
| <b>Medic Mobile</b>     | Staff who support the design, implementation, scale-up, and/or maintenance of 2wT and work for Medic Mobile. Medic Mobile is the 2wT technology partner.                                                                            | No                                     | Ghana, Kenya, Nigeria, Uganda | 5        |
|                         | Staff who support the design, implementation, scale-up, and/or                                                                                                                                                                      | Yes (2/2)                              | Zimbabwe                      | 2        |

---

**MoHCC Site Nurses** maintenance of 2wT and work as MoHCC site nurses or HCWs

---

208

209 MoHCC site nurses conduct 2wT related tasks, such as client recruitment, reviewing clients

210 referred for suspected AEs or loss to follow-up, and 2wT oversight at the health facility-level.

211 ZAZIC partner responsibilities include facilitating the 2wT training; providing overall 2wT system

212 operations oversight, serving as the 2wT “Hub” to triage clients for care, following up on clients

213 lost to follow-up or with suspected AEs, referrals for in-person follow-up, monitoring 2wT system

214 challenges, maintaining documentation, and conducting quality assurance. Technology partners at

215 Medic Mobile provide technical support to the 2wT program, including development of software,

216 upgrading 2wT systems, and supporting continued program staff and HCW use. Our results are

217 organized by three domains: Program Strengths, Program Challenges, and Suggested

218 Improvements, with themes under each domain as presented in Table 2 (below).

219

220 **Table 2:** Results Domains and Corresponding Themes

| Domain 1: 2wT Program Strengths                                                                                                                                                                                                                                                                                                                                                                             | Domain 2: 2wT Program Challenges                                                                                                                                                                                                                                                                                                         | Domain 3: Suggested 2wT Improvements                                                                                                                                                                                                                                                                                                          |
|-------------------------------------------------------------------------------------------------------------------------------------------------------------------------------------------------------------------------------------------------------------------------------------------------------------------------------------------------------------------------------------------------------------|------------------------------------------------------------------------------------------------------------------------------------------------------------------------------------------------------------------------------------------------------------------------------------------------------------------------------------------|-----------------------------------------------------------------------------------------------------------------------------------------------------------------------------------------------------------------------------------------------------------------------------------------------------------------------------------------------|
| <p>Sub-themes</p> <ul style="list-style-type: none"> <li>• 2wT improves quality of client follow-up care</li> <li>• Continuous 2wT training + mentoring is effective</li> <li>• 2wT saves costs for providers, program and clients, creating enthusiasm for scale</li> <li>• The 2wT app is easy for HCWs and clients to use</li> <li>• 2wT is widely accepted by clients, communities and MoHCC</li> </ul> | <p>Sub-themes</p> <ul style="list-style-type: none"> <li>• Lack of 2wT trained or motivated HCWs at site level</li> <li>• Persistent structural technological barriers</li> <li>• Client struggle with SMS cost and SMS frequency</li> <li>• Complexity of data management between MoHCC paper forms and 2wT digital database</li> </ul> | <p>Sub-themes</p> <ul style="list-style-type: none"> <li>• Technology improvements for HCWs and clients</li> <li>• Train more 2wT staff</li> <li>• Replace paper data reporting with 2wT digital M&amp;E</li> <li>• Increase MoHCC ownership and transfer to local e-health systems</li> <li>• Expand 2wT to other health programs</li> </ul> |

221

## 222 **Domain 1: 2wT Program Strengths at Scale**

### 223 *2wT improves quality of client follow-up care.*

224 Interviewees overwhelmingly reported that the 2wT program is largely a success, as one  
225 interviewee remarked, “*we have a lot to really celebrate.*” [IDI-15] HCW interviewees noted  
226 advantages for client care, since now “[clients] *have the motivation and are willing to*  
227 *respond...People are interested in their own health and are willing to communicate directly with*  
228 *the two-way texting nurse.*” [IDI-01] HCWs expressed that 2wT increases close post-operative  
229 monitoring and improves identification of AEs over in-person visits:

230 *“[2wT] has increased the follow-up rate. It also has improved adverse event surveillance.*  
231 *I think that close interaction with clients would always [allow us] to know if there is an*  
232 *adverse event.*” [IDI-07]

233 2wT also appears to improve follow-up data quality since the system both stores interactive  
234 messages and alerts nurses for timely documentation of referrals to care outcomes. Instead of  
235 clerks transcribing clinical notes from multiple sources, the 2wT nurse completes reporting. “*With*  
236 *two-way texting...it’s the service provider who is in contact with the client. [They are] getting*  
237 *first-hand information and entering the data.*” [IDI-09]

238

### 239 *Continuous, on-the-job 2wT training is effective for 2wT scale-up support*

240 Interviewees described the 2wT curriculum content of in-class role plays, 2wT-based practical  
241 exercises, and on-the-job training, as simple and useful. “*The training has been quite successful*  
242 *in giving all the information within a day, and [HCWs are] able to use it soon afterward.*” [IDI-  
243 04] The one-day format caused little disruption to the clinicians’ duties, and the practical training

244 enhanced learning the content. One interviewee noted, “*hands-on [training] sped up the learning*  
245 *process, and also improved the buy-in and appreciation of the technology.*” [IDI-01] When  
246 COVID-19 restrictions led to a temporary change to virtual training, HCWs missed on-site  
247 support and repetitive practice. Still, virtual training did have upsides, because “*all players are*  
248 *there, everyone is there, they exchange ideas. [Training by] visiting HCWs in their facilities takes*  
249 *time and people don’t have one platform to exchange ideas.*” [IDI-08] Interviewees remarked on  
250 the importance of continuous trainings, and voiced that the role of the Hub Nurse should  
251 “[*provide] continuous mentorship support*” [IDI-08]

252

253 ***2wT saves provider, client, and program costs, creating enthusiasm for continued scale-up***

254 Interviewees reported that the 2wT program contributed to resource savings, both financial and  
255 human. For HCWs, 2wT saved travel time over in-person follow-up, leaving time for demand  
256 creation or other health services. On the program level, 2wT also decreases costs, “*because for*  
257 *you to go for follow-ups, you need a vehicle, you need to support the service providers...it involves*  
258 *a lot of personnel. But if there's someone just sitting there and in charge of the clients [via 2wT],*  
259 *it's a lot easier.*” [IDI-02] Respondents noted that 2wT largely eliminates the need for clients to  
260 travel and take time off work. “*Two-way texting came at a time when clients, especially adult*  
261 *males, were not willing to have the commitments to meet the service delivery teams and have them*  
262 *conduct reviews. So, I think it's popular. It's very convenient for clients.*” [IDI-07] Several HCWs  
263 confirmed that client demand for 2wT has grown, so that “*clients will just come in and they'll ask,*  
264 *‘Oh, I want to be part of the clients that will be texting back and forth. I won't be able to come*  
265 *[into the clinic] because I'll be at work.*” [IDI-03]

266



267 ***The 2wT app is easy to use, making it attractive for healthcare workers***

268 For HCWs, most interviewees identified the ease and usability of the 2wT app as a major strength  
269 of the program: *“It’s just very simple steps to follow.... It’s actually very friendly for the*  
270 *healthcare staff.”* [IDI-03] HCWs also remarked on the multi-lingual 2wT system that reaches  
271 clients in their preferred language and that it is easy for clients to use, regardless of their education.  
272 *“The [clients] easily understand it, even those who we were not sure would be able to use it*  
273 *because of literacy levels.”* [IDI-06]. The simplicity of the app for HCW and client users was  
274 attributed to the 2wT co-design approach. A respondent from technology partner, Medic Mobile,  
275 noted: *“We designed a system with our users, for our users.... That’s something that I would say*  
276 *I’m really proud of, just from the start: making sure that the digital health intervention really*  
277 *resonates with its users and that it’s really solving for their pain points.”* [IDI-15]. Interviewees  
278 also appreciated ongoing 2wT adaptation and revision based on ongoing user feedback. For  
279 example, to improve messaging speed, Medic Mobile developers leveraged the Community Health  
280 Toolkit (CHT) integration with another open-source tool, RapidPro, *“to allow more [2wT]*  
281 *messages to be sent out at a given time. I think that’s probably one of the big things...that might*  
282 *be going well with the scale-up.”* [IDI-16]. Frontline HCW appreciated this consistent effort to  
283 simplify and improve their own user experience, that of their VMMC clients.

284

285 ***2wT is widely accepted by clients, communities and MoHCC***

286 Most interviewees reported that the 2wT program was generally well received by clients and  
287 HCWs alike, resulting in a high program uptake. *“The response rate has been good. Even in areas*  
288 *where there is no good [cellular] network.”* [IDI-01] Interviewees identified promotion of the 2wT  
289 follow-up method at community and facility levels as a program strength, including distribution

290 of 2wT branded masks and hats, sensitization on 2wT during community health talks, 2wT training  
291 for village health workers, and VMMC outreach to adult working men highlighting availability of  
292 2wT-based follow-up. As a result, one interviewee stated that “*two-way texting is now a household*  
293 *name.*” However, HCWs noted that broad support was not immediate. HCWs initially had their  
294 own doubts about client safety and concerns about clients’ digital literacy, but with time, “*our*  
295 *population kind of embraced [2wT].*” [IDI-01] While success among clients and HCWs was  
296 encouraging, respondents were most impressed with MoHCC acceptance. “*The fact that the*  
297 *Ministry really appreciated this two-way texting intervention and supported the scale up [is a]*  
298 *huge success.*” [IDI-15] Another respondent considered MoHCC partnership as critical for  
299 success, noting that “[*2wT is*] *a good innovation [which] is telling policymakers that these*  
300 *[physical] follow-ups are not necessary, and policy should be informed by this finding.*” [IDI-02]

301

## 302 **Domain 2: 2wT Approach Challenges for Expansion Maintenance**

### 303 ***Difficult maintaining core numbers of 2wT trained or motivated HCWs at site level***

304 Multiple respondents reported lack of sufficient trained HCW to support the 2wT program.  
305 Although sites had at least one trained staff member, those with only one found that enrolment  
306 was disrupted if the trained nurse was not on duty or took a different job. “*Once our trained nurses*  
307 *have gone away, we have no one enrolling our clients.*” [IDI-04] Multiple partners identified staff  
308 shortages due to attrition, or a shortage of trained HCWs at sites, as a constraint to scale-up.  
309 However, even with on-site 2wT training, staff must perceive 2wT as part of routine duties, and  
310 not as a special or additional task. Multiple interviewees pointed out that some sites had HCWs  
311 who appear reticent to use to 2wT since, “*in some sites, you would get someone who is not very*  
312 *keen with two-way texting.*” [IDI-02]

313

314 ***Persistent technological barriers to sustained 2wT roll-out***

315 Poor cellular network connectivity and access to devices slow 2wT expansion. Of the 16 program  
316 partners interviewed, 13 discussed poor mobile networks as a constraint to scale-up that deprived  
317 program partners and clients access to the system. Especially in rural areas, “*some of the areas are*  
318 *very remote and network coverage is very poor...It's difficult to implement when there is no mobile*  
319 *network.*” [IDI-07]. Still, urban areas could face power outages that affect network availability.  
320 Interviewees also reported that the 2wT app was slow when high volumes of new clients were  
321 added. “*After a while, the system starts to slow down because of the volume of data on it. [Now],*  
322 *we purge old data from the devices, so the system doesn't have to filter through so much data*  
323 *before it loads.*” [IDI-14] System delays can lead HCWs to enroll clients after hours, causing  
324 syncing issues that result in data gaps, or, infrequently, some clients not receiving messages on  
325 time or at all.

326

327 ***Clients struggle with 2wT costs and communication***

328 Interviewees identified client challenges, such as low technology literacy and phone sharing. Some  
329 clients did not have access to a phone or shared a phone with others in their household -- a  
330 particular challenge in rural areas or with the enrollment of minors. IDI-09 commented that, “*Most*  
331 *of them share phones with their parents, their siblings, and sometimes you may get responses, not*  
332 *from the client, but from another person.*” Multiple interviewees also stated that cost was a  
333 potential barrier as clients had to purchase their own airtime for communicating with the nurses  
334 via 2wT. “*The issue of just the availability of the dollar, to be texting back and forth [is a*  
335 *challenge].*” [IDI-03]

336

337 ***Complexity of data management between MoHCC paper forms and 2wT digital database***

338 To date, MoHCC mandates paper reporting for VMMC procedures, resulting in data duplication  
339 for 2wT clients. IDI-02 remarked on *“the duplication of the system in the enrollment. Because we*  
340 *have paper-based client intake forms, and we have this two-way texting system, which is collecting*  
341 *the same data.”* IDI-03 identified the additional work this created, noting the need *“for the hard*  
342 *copy for the circumcision itself. As much as we are going to enter them into the system, we are still*  
343 *going to enter them in another physical form.”* Making changes to global or national policies such  
344 as discontinuation of paper forms is not simple. *“There is not much control in terms of determining*  
345 *the pace of moving things. It's all reliant on the Ministry of Health.”* [IDI-13]

346 **Domain 3: Suggestions to facilitate wider scale-up of the 2wT approach**

347 ***Improve the technology for HCWs and clients***

348 Several interviewees stated that previous clients should be archived to free the system memory  
349 and increase the application speed on HCW devices. Features such as improved data visualization  
350 and audible notifications for new messages could promote timely nurse responses. Several  
351 interviewees proposed 2wT be delivered on WhatsApp, versus traditional SMS, *“because with*  
352 *WhatsApp, [clients] say it's cheaper, and they no longer communicate using an SMS.* [IDI-05]  
353 Additionally, multiple interviewees discussed needing system updates to allow multiple clients to  
354 enroll with the same phone number or f multiple phone numbers per person, accommodating those  
355 with multiple SIM cards. *“The platform should allow a number to be entered twice, especially*  
356 *when the surname is the same, to show that these [clients] are related and they're using the same*  
357 *number.”* [IDI-11] Lastly, considerations of improved security, such as two factor authentication  
358 for access to 2wT client data were voiced as being needed.

359

360 ***Train, and refresher train, more 2wT staff***

361 While almost every interviewee stated that the 2wT training was an overall success, some  
362 cautioned, *“if you are to expand, there is a need to cascade the training down, so that you can also  
363 have provincial-based trainers, or district, or even site-based trainers.”* [IDI-07] Incorporating  
364 the 2wT program training into the standard VMMC training package for all new VMMC staff  
365 could also ensure that all MOH service providers become skilled with 2wT: *“Because when we, if  
366 we, are going into sustainability, that is going to be a huge barrier.”* [IDI-11] Lastly, improving  
367 the training’s reach by extending 2wT training to community health workers, and offering  
368 consistent refresher training, will help fill personnel gaps: *“when one [trained healthcare worker]  
369 is absent, or unwilling, another can take over.”* [IDI-06]

370

371 ***Replace paper with 2wT for all VMMC data***

372 Duplication of paper and electronic data increases HCW burden, potentially compromising data  
373 completeness in either system. *“Maybe if we could do away with the paper based and we just go  
374 digital, it might improve our adverse event reporting?”* [IDI-04] Another interviewee suggested  
375 that if all VMMC data were entered into the same system, 2wT enrollments could be automated,  
376 and those not enrolled into 2wT could still have their routine VMMC data entered digitally. *“Those  
377 with phone numbers automatically go into two-way texting. Those without, you have to indicate  
378 that they didn’t bring a phone. Electronically moving away from the use of paper [client intake  
379 forms].”* [IDI-11] Comprehensive electronic VMMC data could ensure data linkage *“to other  
380 databases that are used by Ministry of Health as well, so that it’s available to a wider group,”*  
381 [IDI-08], making data more readily available to decision-makers.

382

383 ***Transition 2wT to more MoHCC ownership and integrate 2wT into Zimbabwean e-health***

384 Several respondents noted a desire to offer 2wT to other VMMC implementing partners and  
385 transferring implementation to central MoHCC leadership. 2wT could be “*made a national thing,*  
386 *through the Ministry of Health through sensitization...to say, now everybody's using two-way*  
387 *texting through the Ministry of Health, I think that would improve uptake.*” [IDI-04] The open-  
388 source (no fee) CHT 2wT software gave respondents optimism for potential MoHCC transition,  
389 “*because we were worried that if its proprietary software, once the other partners would be off*  
390 *[stop funding 2wT], the Ministry of Health would not be able to sustain its use.*” [IDI-13] To  
391 support transition, respondents noted that local software engineers from partner organizations  
392 and/or MoHCC must be trained to competence and confidence in the CHT, including the 2wT  
393 system, and that 2wT would need local server hosting. “*Transiting software engineering skills to*  
394 *the local team for 2wT maintenance is a priority for consistently meeting the needs of end users.*  
395 [IDI15]. Lastly, there is a huge leap between recognizing 2wT benefits and integrating 2wT into  
396 MoHCC e-health architecture. “*Trying to sell [2wT] to the other people, especially the health*  
397 *informatics department, they appreciate it, but they had huge expectations that two-way texting*  
398 *would seamlessly integrate with all aspects of the electronic health system.*” [IDI-01] The pathway  
399 forward is neither simple nor straightforward.

400

401 ***Expand 2wT follow-up to other health conditions beyond VMMC***

402 All respondents noted that 2wT could benefit clients and HCWs beyond VMMC. “*There are so*  
403 *many opportunities of which we haven't done much in terms of demand creation... [2wT]*  
404 *information dissemination, there is a huge gap and opportunity.*” [IDI-07] For example, 2wT

405 supported VMMC service delivery during COVID-19 and could be leveraged for subsequent  
406 pandemic waves. *“Two-way texting has come at the right time, because we are able to review  
407 clients without physical reviews... during this outbreak of COVID.”* [IDI-05] As COVID-19  
408 wanes, but client demand for improved communication with HCWs grows, interviewees identified  
409 areas for 2wT growth. *“For example, growth monitoring, HIV care and treatment, immunizations  
410 and so on. It will be very useful because it informs the health worker how the client is and will  
411 keep the client informed about when to make a certain visit or take drugs.”* [IDI-06] Another  
412 interviewee suggested that 2wT can provide *“follow-up for outpatients with chronic conditions,  
413 say the diabetics or hypertensive clients, they can measure their own blood pressure and give  
414 feedback via 2wT and avoid unnecessary movements going back to the hospital or clinic.”* [IDI-  
415 07]

## 416 **DISCUSSION**

417 This paper shares perspectives, insights, and suggestions from a unique set of 2wT app  
418 stakeholders, including frontline HCWs and software developers, to increase understanding of the  
419 process, pitfalls, and pathways forward to bring 2wT to scale in routine VMMC settings in  
420 Zimbabwe. These lessons learned should be of great interest in South Africa where 2wT is scaling  
421 after evidence of safety, usability, and efficiency gains.[18–20] Interviewees noted that drivers of  
422 2wT scale-up included enhanced promotion of client care and cost benefits, comprehensive and  
423 continuous HCW training, and ease of app use for HCWs and clients. In contrast, lack of available  
424 HCWs, technology challenges, client communication costs, and complexities in the transition to  
425 MoHCC ownership stymied progress. Interviewees suggested that national 2wT scale-up would  
426 benefit from an expanded training cascade, transitioning from paper to digital VMMC reporting,

427 MoHCC ownership of 2wT, and using the 2wT model for other short-term client follow-up.  
428 Several lessons learned merit additional consideration.

429

430 First, the 2wT training and mentorship model appears to play a critical role in creating cadres of  
431 confident, competent, 2wT HCW users. Similar to an evaluation from Sierra Leone demonstrating  
432 the critical importance of both initial and refresher training for HCWs for institutionalization,[38]  
433 2wT respondents believed that the combination of brief (<1 day) on-site training with continuous  
434 and accessible mentoring was effective to engage providers and facility teams in 2wT  
435 implementation and maintenance. During COVID-19, remote technology-based training (Zoom or  
436 WhatsApp) was an advantageous stop-gap and fit easily into HCWs personal schedules.[39]  
437 However, it is clear that HCWs preferred on-site in-person training and follow-up mentoring when  
438 possible. To facilitate in-person training, more decentralized 2wT training cascades across more  
439 districts are needed to more swiftly respond to shortages of 2wT-trained HCWs and sustain  
440 implementation at scale.[40]

441

442 Second, as with other mHealth apps, 2wT enhanced provider to client communication and built  
443 relationships. As men typically underutilize healthcare services,[41,42] mHealth appears to  
444 strengthen the relationships between male clients and their HCWs.[17,19] HCWs are aware that  
445 men may not be proactive seekers of healthcare services and want to better engage their male  
446 clients in care.[43] 2wT helped clinicians better care for their rural and distant clients by providing  
447 a platform for timely client/provider communication,[44] engaging clients and providers in a  
448 shared responsibility for healing.[45] Our findings largely complement a recent review that found



449 mHealth could improve coordination among HCWs, promote flexibility in follow-up care, and  
450 enhance relationships between clients and their care givers.[45]

451

452 While technology still presents some barriers, client and provider creativity can help overcome  
453 challenges reaching clients in more remote or less connected areas. 2wT is offline-first, allowing  
454 clients to enroll even without network coverage. Data are stored and then synced later when  
455 providers return to connectivity. Although 2wT requires that clients receive an enrollment message  
456 to confirm their correct phone number for follow-up, many facilities now utilize solar power and  
457 providers access facility WIFI to connect daily, minimizing delays in messages being sent and  
458 received. Provider confidence in reaching clients is maintained despite short-term delays in  
459 messaging. Moreover, even in areas with poor connectivity, clients are aware of where to receive  
460 a signal near their homes or workplaces. Clients seek out these network “spot zones” for other  
461 communication needs and can receive and respond to 2wT messages concurrently, meeting the  
462 program reporting requirements and preventing client loss-to-follow-up.

463

464 Results from this qualitative study led to several program improvements since study conclusion.  
465 First, ZAZIC now enrolls minors aged 15-17 years in 2wT via the minor’s or the parent/guardian’s  
466 phone, expanding access to 2wT. Second, in response to client and provider feedback, daily text  
467 message with required response volume was reduced from 15 to 11 and language offerings were  
468 expanded to include Ndebele. These changes increased the educational content, reduced SMS  
469 volume overall, and responded to client communication preferences. Third, clients are offered \$1  
470 for initial transport reimbursement and to offset 2wT airtime costs, decreasing cost barriers to 2wT  
471 uptake. Fourth, system improvements allow clients to register with a primary and secondary

472 number, responding from either number as network connectivity fluctuates. 2wT enrolls surgical  
473 and device-based VMMC clients (e.g., ShangRing), allowing men to have 2wT follow-up  
474 regardless of VMMC method. Lastly, technology improvements, such as weekly data purging and  
475 procuring phones with larger memory, have sped up processing for providers and facilities.

476

477 This study has several limitations. First, client perspectives from the scale-up phase were not  
478 included, but are warranted in future study. Second, interviewees who volunteered for this study  
479 may have had more time, capacity, and interest in the program than their counterparts who declined  
480 to participate. Additionally, while all partner organizations were represented, it is likely that views  
481 within partner organizations vary, and we likely did not capture the full range of views. Further  
482 study focusing on the technology perspective could further illuminate specific technical areas that  
483 were not well explored. Finally, these interviews took place over Zoom, sometimes with a poor  
484 connection, which may have led to some lack of clarity in transcription or reduced conversation  
485 comfort, potentially impacting the interview quality. Although these biases cannot be quantified,  
486 the research team feels that the strengths of this exploratory study outweigh the weaknesses,  
487 contributing understanding to mHealth scale up in Sub-Saharan Africa.

## 488 **Conclusion**

489 There is rigorous evidence of 2wT's positive impact on client care quality and acceptability among  
490 HCWs, but widespread scale-up remains incomplete. Despite enrollments of over 33,000 males  
491 ages 15 and older, and broad approval from diverse client, provider, partner, and MoHCC  
492 stakeholders, digital innovations still present complex challenges to further scale up. For long-term  
493 success, how and when to integrate 2wT into current e-health platforms, including potential

494 integration into the Electronic Health Records (EHR) system, should be further explored.  
495 Continuous collaboration between mHealth program implementers across all VMMC partners,  
496 from ZAZIC to MoHCC, would help foster continuous 2wT improvements for clients and  
497 providers across districts. Although the 2wT app is free to use, highly skilled and paid workers are  
498 needed to adapt, maintain, and manage the system. In the short-term, ZAZIC is growing its  
499 capacity to independently manage the CHT-based 2wT app with support from Medic Mobile,  
500 creating a transition plan for local 2wT management, supervision, and maintenance on the pathway  
501 to MoHCC ownership. However, for longer-term 2wT transition to MoHCC, human resources,  
502 funding for SMS, server space, and availability of trained technology teams are required. If  
503 leveraged well, as noted by one respondent, 2wT could be utilized in a variety of settings and  
504 health conditions: “The opportunities are really endless.”

505

## 506 **Acknowledgements**

507 The authors would like to thank the members of the ZAZIC Consortium, including the  
508 International Training and Education Center for Health (I-TECH,) the Zimbabwe Association of  
509 Church Related Hospitals (ZACH), Zimbabwe Community Health Intervention Research  
510 (ZiCHIRe), and Zimbabwe Technical Assistance Training & Education Center for Health (Zim-  
511 TTECH) for their support of 2wT. The authors would also like to appreciate the collaboration of  
512 the MoHCC and the facility teams for their dedication to quality VMMC service delivery,  
513 including 2wT based follow-up.

## References

1. UNAIDS, WHO. Voluntary Medical Male Circumcision [Internet]. Geneva, Switzerland; 2021 Feb [cited 2021 Nov 14]. (UNAIDS and WHO Progress Brief). Available from: <https://www.malecircumcision.org/resource/unaid-and-who-progress-brief-voluntary-medical-male-circumcision-february-2021>
2. Bochner AF, Feldacker C, Makunike B, Holec M, Murenje V, Stepaniak A, et al. Adverse event profile of a mature voluntary medical male circumcision programme performing PrePex and surgical procedures in Zimbabwe. *Journal of the International AIDS Society*. 2017 Mar 1;20(1).
3. Hellar A, Plotkin M, Lija G, Mwanamsangu A, Mkungume S, Christensen A, et al. Adverse Events in a Large-Scale VMMC Programme in Tanzania: Findings from a Case Series Analysis. *Journal of the International AIDS Society*. 2019 Jul 1;22(7):e25369.
4. Muchiri E, Charalambous S, Ginindza S, Maraisane M, Maringa T, Vranken P, et al. Description of adverse events among adult men following voluntary medical male circumcision: Findings from a circumcision programme in two provinces of South Africa. *PLoS ONE*. 2021 Aug 17;16(8):e0253960–e0253960.
5. O’Bryan G, Feldacker C, Ensminger A, Nghatanga M, Brandt L, Shepard M, et al. Adverse event profile and associated factors following surgical voluntary medical male circumcision in two regions of Namibia, 2015-2018. *PLoS ONE*. 2021 Oct 20;16(10):e0258611–e0258611.

6. Omollo V, Marongwe P, Murenje V, Madoda T, Paidamoyo G, Gwenzi F, et al. Adverse Event Trends Within a Large-Scale, Routine, Voluntary Medical Male Circumcision Program in Zimbabwe, 2014–2019. *JAIDS Journal of Acquired Immune Deficiency Syndromes*. 2021 Oct 1;88(2):173–80.
7. Lucas T, Cooney C, Prainito A, Godfrey C, Kiggundu V, Thomas AG, et al. Consolidated Overview of Notifiable Adverse Events in the U.S. President’s Emergency Plan for AIDS Relief’s Voluntary Medical Male Circumcision Program Through 2020. *Current HIV/AIDS reports*. 2022;19(6):508–15.
8. Brito S, Korn A, Monteiro L, Mudender F, Maiela A, Come J, et al. Need for improved detection of voluntary medical male circumcision adverse events in Mozambique: a mixed-methods assessment. *BMC Health Services Research*. 2019 Nov 21;19(1):85.
9. U.S. Department of State. PEPFAR Country/Regional Operational Plan 2022 Guidance (COP/ROP 2022). 2022. (The United States President’s Emergency Plan for AIDS Relief Country Operational Plan Guidance).
10. Feldacker C, Murenje V, Holeman I, Makunike-Chikwinya B, Korir M, Gundidza PT, et al. Reducing Provider Workload While Preserving Patient Safety: A Randomized Control Trial Using 2-Way Texting for Postoperative Follow-up in Zimbabwe’s Voluntary Medical Male Circumcision Program. *JAIDS*. 2020 Jan 1;83(1):16–23.
11. Feldacker C, Bochner AF, Murenje V, Makunike-Chikwinya B, Holec M, Xaba S, et al. Timing of adverse events among voluntary medical male circumcision clients: Implications from routine service delivery in Zimbabwe. *PLoS One*. 2018 Sep;13(9):e0205113.

12. Feldacker C, Murenje V, Makunike-Chikwinya B, Hove J, Munyaradzi T, Marongwe P, et al. Balancing competing priorities: Quantity versus quality within a routine, voluntary medical male circumcision program operating at scale in Zimbabwe. *PLoS ONE*. 2020 Oct 13;15(10):e0240425–e0240425.
13. Babigumira JB, Barnhart S, Mendelsohn JM, Murenje V, Tshimanga M, Mauhy C, et al. Cost-effectiveness analysis of two-way texting for post-operative follow-up in Zimbabwe’s voluntary medical male circumcision program. *PLoS ONE*. 2020 Sep 30;15(9):e0239915–e0239915.
14. Feldacker C, Holeman I, Murenje V, Xaba S, Korir M, Wambua B, et al. Usability and acceptability of a two-way texting intervention for post-operative follow-up for voluntary medical male circumcision in Zimbabwe. *PLoS ONE*. 2020 Jun 16;15(6):e0233234–e0233234.
15. Feldacker C, Murenje V, Barnhart S, Xaba S, Makunike-Chikwinya B, Holeman I, et al. Reducing provider workload while preserving patient safety via a two-way texting intervention in Zimbabwe’s voluntary medical male circumcision program: study protocol for an un-blinded, prospective, non-inferiority, randomized controlled trial. *Trials* [Internet]. 2019 Jul 23 [cited 2023 Jun 6];20(1). Available from: <https://go.gale.com/ps/i.do?p=AONE&sw=w&issn=17456215&v=2.1&it=r&id=GALE%7CA594811253&sid=googleScholar&linkaccess=abs>
16. Community Health Toolkit [Internet]. [cited 2023 Feb 13]. The Community Health Toolkit (CHT). Available from: <https://communityhealthtoolkit.org>

17. Marongwe P, Wasunna B, Murenje V, Gavera J, Gwenzi F, Hove J, et al. Transitioning a digital health innovation from research to routine practice: two-way texting for male circumcision follow-up in Zimbabwe. *PLOS Digital Health*. 2022;
18. Feldacker C, Pienaar J, Wasunna B, Ndebele F, Khumalo C, Day S, et al. Expanding the Evidence on the Safety and Efficiency of 2-Way Text Messaging-Based Telehealth for Voluntary Medical Male Circumcision Follow-up Compared With In-Person Reviews: Randomized Controlled Trial in Rural and Urban South Africa. *Journal of medical Internet research*. 2023;25:e42111–e42111.
19. Day S, Ncube V, Maja L, Wasunna B, Pienaar J, Setswe G, et al. Centering Frontline Health Care Workers in Digital Innovation Design to Inform the Optimization of an App for Improved Male Circumcision Follow-up in South Africa: Qualitative Usability Study. *JMIR formative research*. 2023;7:e44122–e44122.
20. Pienaar J, Day S, Setswe G, Wasunna B, Ncube V, Ndebele F, et al. ‘I understood the texting process well’. Participant perspectives on usability and acceptability of SMS-based telehealth follow-up after voluntary medical male circumcision in South Africa. *Digital health*. 2023;9:20552076231194924–20552076231194924.
21. Principles for Digital Development 2022. Principles for Digital Development [Internet]. 2022. [cited 2022 August 01] Available from: <https://digitalprinciples.org/>
22. World Health Organization. WHO guideline: recommendations on digital interventions for health system strengthening: web supplement 2: summary of findings and GRADE tables. World Health Organization; 2019.

23. World Health Organization. Classification of Digital Health Interventions v1. 0: A Shared Language to Describe the Uses of Digital Technology for Health [Internet]. 2018. [cited 2021 October 1] Available from:  
<https://apps.who.int/iris/bitstream/handle/10665/260480/WHO-RHR-18.06-eng.pdf>
24. Duffy A, Christie GJ, Moreno S. The Challenges Toward Real-world Implementation of Digital Health Design Approaches: Narrative Review. *JMIR Hum Factors*. 2022 Sep 9;9(3):e35693. doi: 10.2196/35693. PubMed PMID: 36083628; PubMed Central PMCID: PMC9508664.
25. Elo S, Kääriäinen M, Kanste O, Pölkki T, Utriainen K, Kyngäs H. Qualitative Content Analysis: A Focus on Trustworthiness. *SAGE open*. 2014;4(1):215824401452263.
26. Guo C, Ashrafian H, Ghafur S, Fontana G, Gardner C, Prime M. Challenges for the evaluation of digital health solutions—A call for innovative evidence generation approaches. *npj Digit Med*. 2020 Aug 27;3(1):1–14.
27. Holst C, Sukums F, Radovanovic D, Ngowi B, Noll J, Winkler AS. Sub-Saharan Africa—the new breeding ground for global digital health. *Lancet Digital Health*. 2020;2(4):e160-162.
28. UNICEF. Pulse Check On Digital Learning [Internet]. 2022 Dec [cited 2023 Feb 13]. Available from: <https://www.unicef.org/reports/pulse-check>
29. Bazzano AN, Martin J, Hicks E, Faughnan M, Murphy L. Human-centred design in global health: A scoping review of applications and contexts. *PloS one*. 2017;12(11):e0186744–e0186744.



30. Norman MK, Hamm ME, Schenker Y, Mayowski CA, Hierholzer W, Rubio DM, et al. Assessing the Application of Human-Centered Design to Translational Research. *Journal of Clinical and Translational Science*. 2021;5(1):e130–e130.
31. Beres LK, Simbeza S, Holmes CB, Mwamba C, Mukamba N, Sharma A, et al. Human-Centered Design Lessons for Implementation Science: Improving the Implementation of a Patient-Centered Care Intervention. *Journal of acquired immune deficiency syndromes (1999)*. 2019;82 Suppl 3(3):S230–43.
32. Noy C. Sampling Knowledge: The Hermeneutics of Snowball Sampling in Qualitative Research. *International Journal of Social Research Methodology*. 2008 Oct;11(4):327–44.
33. Pope C, Mays N. *Qualitative research in health care*. 3rd ed. Malden, Mass: Blackwell Pub./BMJ Books; 2006.
34. Hennink M, Kaiser BN. Sample sizes for saturation in qualitative research: A systematic review of empirical tests. *Social science & medicine (1982)*. 2022;292:114523–114523.
35. Braun V, Clarke V. Using thematic analysis in psychology. *Qualitative Research in Psychology*. 2006 Apr;3(2):77–101.
36. Elliot V. Thinking about the Coding Process in Qualitative Data Analysis. *The Qualitative Report*. 2018;23(11):2850–61.
37. Savage J. One voice, different tunes: issues raised by dual analysis of a segment of qualitative data. *Journal of Advanced Nursing Science*. 2000;31(6):1493–500.

38. Mc Kenna P, Babughirana G, Amponsah M, Egoeh SG, Banura E, Kanwagi R, et al. Mobile training and support (MOTS) service-using technology to increase Ebola preparedness of remotely-located community health workers (CHWs) in Sierra Leone. *mHealth*. 2019;5:35–35.
39. Thomas MP, Kozikott S, Kamateeka M, Abdu-Aguye R, Agogo E, Bello BG, et al. Development of a simple and effective online training for health workers: results from a pilot in Nigeria. *BMC public health*. 2022;22(1):551–551.
40. Bakibinga P, Kamande E, Kisia L, Omuya M, Matanda DJ, Kyobutungi C. Challenges and prospects for implementation of community health volunteers’ digital health solutions in Kenya: a qualitative study. *BMC health services research*. 2020;20(1):888–888.
41. Prata N, Weidert K, Soro DR. A mixed-methods study to explore opportunities and challenges with using a mHealth approach to engage men who have sex with men in HIV prevention, treatment and care in Lomé, Togo. *mHealth*. 2021;7:47–47.
42. Beia T, Kielmann K, Diaconu K. Changing men or changing health systems? A scoping review of interventions, services and programmes targeting men’s health in sub-Saharan Africa. *International journal for equity in health*. 2021;20(1):87–87.
43. Mbokazi N, Madzima R, Leon N, Lurie MN, Cornell M, Schmidt BM, et al. Health Worker Experiences of and Perspectives on Engaging Men in HIV Care: A Qualitative Study in Cape Town, South Africa. *Journal of the International Association of Providers of AIDS Care*. 2020;19:2325958220935691–2325958220935691.

44. Fairbanks J, Beima-Sofie K, Akinyi P, Matemo D, Unger JA, Kinuthia J, et al. “You Will Know That Despite Being HIV Positive You Are Not Alone”: Qualitative Study to Inform Content of a Text Messaging Intervention to Improve Prevention of Mother-to-Child HIV Transmission. *JMIR mHealth and uHealth*. 2018;6(7):e10671.
  
45. Odendaal WA, Watkins JA, Leon N, Goudge J, Griffiths F, Tomlinson M, et al. Health workers’ perceptions and experiences of using mHealth technologies to deliver primary healthcare services: a qualitative evidence synthesis. *Cochrane Database of Systematic Reviews*. 2020;(3).

1. **Principles for Digital Development** [<https://digitalprinciples.org/>]
